# Supplementary material for: Perioperative Chemotherapy for Gastro-Esophageal or Gastric Cancer: Anthracyclin Triplets versus FLOT
Source: MDPI journal article supplement (doi:10.3390/cancers16071291), 2024-03-26
Supplement: s1 [file s1]

## Supplementary tables and figures

**Table S1**

Patient and tumor characteristics of the current study and the FLOT4-AIO trial

|                               | <b>This study</b>                        |                          | <b>FLOT4-AIO trial</b>     |                         |
|-------------------------------|------------------------------------------|--------------------------|----------------------------|-------------------------|
| <b>Characteristics</b>        | <b>Anthracyclin triplets (n= 913, %)</b> | <b>FLOT (n= 1069, %)</b> | <b>ECF/ECX (n= 360, %)</b> | <b>FLOT (n= 356, %)</b> |
| <b>Sex</b>                    |                                          |                          |                            |                         |
| Male                          | 597 (65)                                 | 733 (69)                 | 265 (74)                   | 268 (75)                |
| <b>Age (median [range])</b>   | 66 (59 – 72)                             | 67 (59 – 73)             | 62 (52 – 69)               | 62 (54 – 69)            |
| <b>Tumor type</b>             |                                          |                          |                            |                         |
| Adenocarcinoma                | 753 (83)                                 | 912 (85)                 | 259 (72)                   | 256 (72)                |
| Signet ring cells             | 151 (17)                                 | 145 (14)                 | 101 (28)                   | 100 (28)                |
| Other                         | 9 (1)                                    | 12 (1)                   | -                          | -                       |
| <b>Lauren classification</b>  |                                          |                          |                            |                         |
| Diffuse                       | 363 (40)                                 | 381 (36)                 | 96 (27)                    | 95 (27)                 |
| Intestinal or mixed           | 395 (43)                                 | 579 (54)                 | 163 (45)                   | 159 (45)                |
| Unknown                       | 155 (17)                                 | 109 (10)                 | 101 (28)                   | 102 (29)                |
| <b>Clinical T-stage</b>       |                                          |                          |                            |                         |
| cT1                           | -                                        | -                        | 2 (1)                      | 3 (1)                   |
| cT2                           | 330 (36)                                 | 243 (23)                 | 59 (16)                    | 49 (14)                 |
| cT3                           | 390 (43)                                 | 662 (62)                 | 253 (70)                   | 267 (75)                |
| cT4a                          | 46 (5)                                   | 85 (8)                   | 33 (9)                     | 28 (8)                  |
| cTx                           | 147 (16)                                 | 79 (7)                   | 13 (4)                     | 9 (3)                   |
| <b>Clinical N-stage</b>       |                                          |                          |                            |                         |
| cN0                           | 480 (53)                                 | 529 (50)                 | 70 (19)                    | 77 (22)                 |
| cN+                           | 404 (44)                                 | 507 (47)                 | 290 (81)                   | 279 (78)                |
| Unknown                       | 29 (3)                                   | 33 (3)                   | -                          | -                       |
| <b>WHO performance status</b> |                                          |                          |                            |                         |
| 0                             | 403 (44)                                 | 537 (50)                 | 254 (71)                   | 246 (69)                |
| 1                             | 293 (32)                                 | 374 (35)                 | 103 (29)                   | 109 (31)                |
| 2                             | 26 (3)                                   | 30 (3)                   | 3 (1)                      | 1 (<1)                  |
| 3-4                           | 2 (<1)                                   | 9 (1)                    | -                          | -                       |
| Unknown                       | 189 (21)                                 | 119 (11)                 | -                          | -                       |

FLOT: fluorouracil, leucovorin, oxaliplatin and docetaxel; ECF: epirubicin/cisplatin/5-fluorouracil; ECX: epirubicin/cisplatin/capecitabin

**Table S2**

Patient and tumor characteristics

| Characteristics                | Anthracyclin triplets (n= 913, %) | FLOT (n= 1069, %) | Primary resection (n= 1053, %) | P-value                      |
|--------------------------------|-----------------------------------|-------------------|--------------------------------|------------------------------|
| <b>Sex</b>                     |                                   |                   |                                |                              |
| Male                           | 597 (65.4)                        | 733 (68.6)        | 656 (62.3)                     | <b>0.010<sup>a</sup></b>     |
| <b>Age</b> (median [IQR])      | 66 (59 – 72)                      | 67 (59 – 73)      | 78 (71 – 82)                   | N/A                          |
| <b>Tumor type</b>              |                                   |                   |                                |                              |
| Adenocarcinoma                 | 753 (82.5)                        | 912 (85.3)        | 872 (82.8)                     | <b>&lt;0.001<sup>a</sup></b> |
| Signet ring cells              | 151 (16.5)                        | 145 (13.6)        | 144 (13.7)                     |                              |
| Other                          | 9 (1.0)                           | 12 (1.1)          | 37 (3.5)                       |                              |
| <b>Differentiation grade</b>   |                                   |                   |                                |                              |
| Well differentiated (G1)       | 18 (2.0)                          | 17 (1.6)          | 13 (1.2)                       | <b>&lt;0.001<sup>a</sup></b> |
| Moderately differentiated (G2) | 228 (25.0)                        | 316 (29.6)        | 386 (36.7)                     |                              |
| Poorly differentiated (G3)     | 476 (52.1)                        | 553 (51.7)        | 550 (52.2)                     |                              |
| Poorly differentiated (G3)     | 8 (0.9)                           | 5 (0.5)           | 11 (1.0)                       |                              |
| Undifferentiated (G4)          | 183 (20.0)                        | 178 (16.7)        | 93 (8.8)                       |                              |
| Grade cannot be assessed (Gx)  |                                   |                   |                                |                              |
| <b>Lauren classification</b>   |                                   |                   |                                |                              |
| Intestinal                     | 360 (39.4)                        | 529 (49.5)        | 573 (56.4)                     | <b>&lt;0.001<sup>a</sup></b> |
| Diffuse                        | 363 (39.8)                        | 381 (35.6)        | 293 (28.8)                     |                              |
| Mixed                          | 35 (3.8)                          | 50 (4.7)          | 45 (4.4)                       |                              |
| Unknown                        | 155 (17.0)                        | 109 (10.2)        | 142 (13.5)                     |                              |
| <b>Clinical T-stage</b>        |                                   |                   |                                |                              |
| cT2                            | 330 (36.1)                        | 243 (22.7)        | 370 (35.1)                     | <b>&lt;0.001<sup>a</sup></b> |
| cT3                            | 390 (42.7)                        | 662 (61.9)        | 367 (34.9)                     |                              |
| cT4a                           | 46 (5.0)                          | 85 (8.0)          | 38 (3.6)                       |                              |
| cTx                            | 147 (16.1)                        | 79 (7.4)          | 278 (26.4)                     |                              |
| <b>Clinical N-stage</b>        |                                   |                   |                                |                              |
| cN0                            | 480 (52.6)                        | 529 (49.5)        | 736 (69.9)                     | <b>&lt;0.001<sup>a</sup></b> |
| cN1                            | 249 (27.3)                        | 326 (30.5)        | 193 (18.3)                     |                              |
| cN2                            | 146 (16.0)                        | 162 (15.2)        | 77 (7.3)                       |                              |
| cN3                            | 9 (1.0)                           | 19 (1.8)          | 2 (0.2)                        |                              |
| cN3a                           | -                                 | -                 | 1 (0.1)                        |                              |
| cNx                            | 29 (3.2)                          | 33 (3.1)          | 44 (4.2)                       |                              |
| <b>WHO performance status</b>  |                                   |                   |                                |                              |
| 0                              | 403 (44.1)                        | 537 (50.2)        | 246 (23.4)                     | <b>&lt;0.001<sup>a</sup></b> |
| 1                              | 293 (32.1)                        | 374 (35.0)        | 272 (25.8)                     |                              |
| 2-4                            | 28 (3.1)                          | 39 (3.6)          | 147 (14.0)                     |                              |
| Unknown                        | 189 (20.7)                        | 119 (11.1)        | 388 (36.8)                     |                              |
| <b>Number of comorbidities</b> |                                   |                   |                                |                              |
| 0                              | 477 (52.2)                        | 555 (51.9)        | 336 (31.9)                     |                              |
| 1                              | 347 (38.0)                        | 437 (40.9)        | 361 (34.3)                     |                              |
| ≥2                             | 33 (3.6)                          | 47 (4.4)          | 302 (28.7)                     |                              |

|         |          |          |          |                               |
|---------|----------|----------|----------|-------------------------------|
| Unknown | 56 (6.1) | 30 (2.8) | 54 (5.1) | <b>&lt;0.001</b> <sup>a</sup> |
|---------|----------|----------|----------|-------------------------------|

N/A: not applicable;

<sup>a</sup> Chi-square p-value

**Table S3**

Number of patients who underwent primary resection over the past years

| <b>Year of treatment</b> | <b>Number of patients who underwent primary resection</b> | <b>Number of patients who underwent neoadjuvant therapy (<math>\pm</math> resection)</b> | <b>Total number of patients</b> | <b>Percentage of primary resections</b> |
|--------------------------|-----------------------------------------------------------|------------------------------------------------------------------------------------------|---------------------------------|-----------------------------------------|
| 2015                     | 186                                                       | 291                                                                                      | 477                             | 39.0%                                   |
| 2016                     | 176                                                       | 280                                                                                      | 456                             | 38.6%                                   |
| 2017                     | 149                                                       | 254                                                                                      | 403                             | 37.0%                                   |
| 2018                     | 146                                                       | 310                                                                                      | 456                             | 32.0%                                   |
| 2019                     | 128                                                       | 280                                                                                      | 408                             | 31.4%                                   |
| 2020                     | 148                                                       | 276                                                                                      | 424                             | 34.9%                                   |
| 2021                     | 120                                                       | 291                                                                                      | 411                             | 29.2%                                   |
